# Supplementary material for: An integrated genome and phenome-wide association study approach to understanding atrial fibrillation’s disease predisposition
Source: Research Square preprint supplement (doi:10.21203/rs.3.rs-5004510/v1), 2024-10-08
Supplement: Supplementary file 1 [file a96dc701edae645493f0c160.docx]

**Phewas-based clustering of mendelian randomization instruments reveals predisposition of atrial fibrillation**

Honghao H, Yi Z, Xiaohong W, Zhen Z, Ke Yang* and Mei Xin*

Department of Cardiovascular Surgery, General Hospital of Western Theater Command (Chengdu Military General Hospital), Chengdu 610036,

*Correspondence: yangke0119@163.com; xinmei197212@163.com

**The causal effect of associated risk on AF: ukb-b-7352**


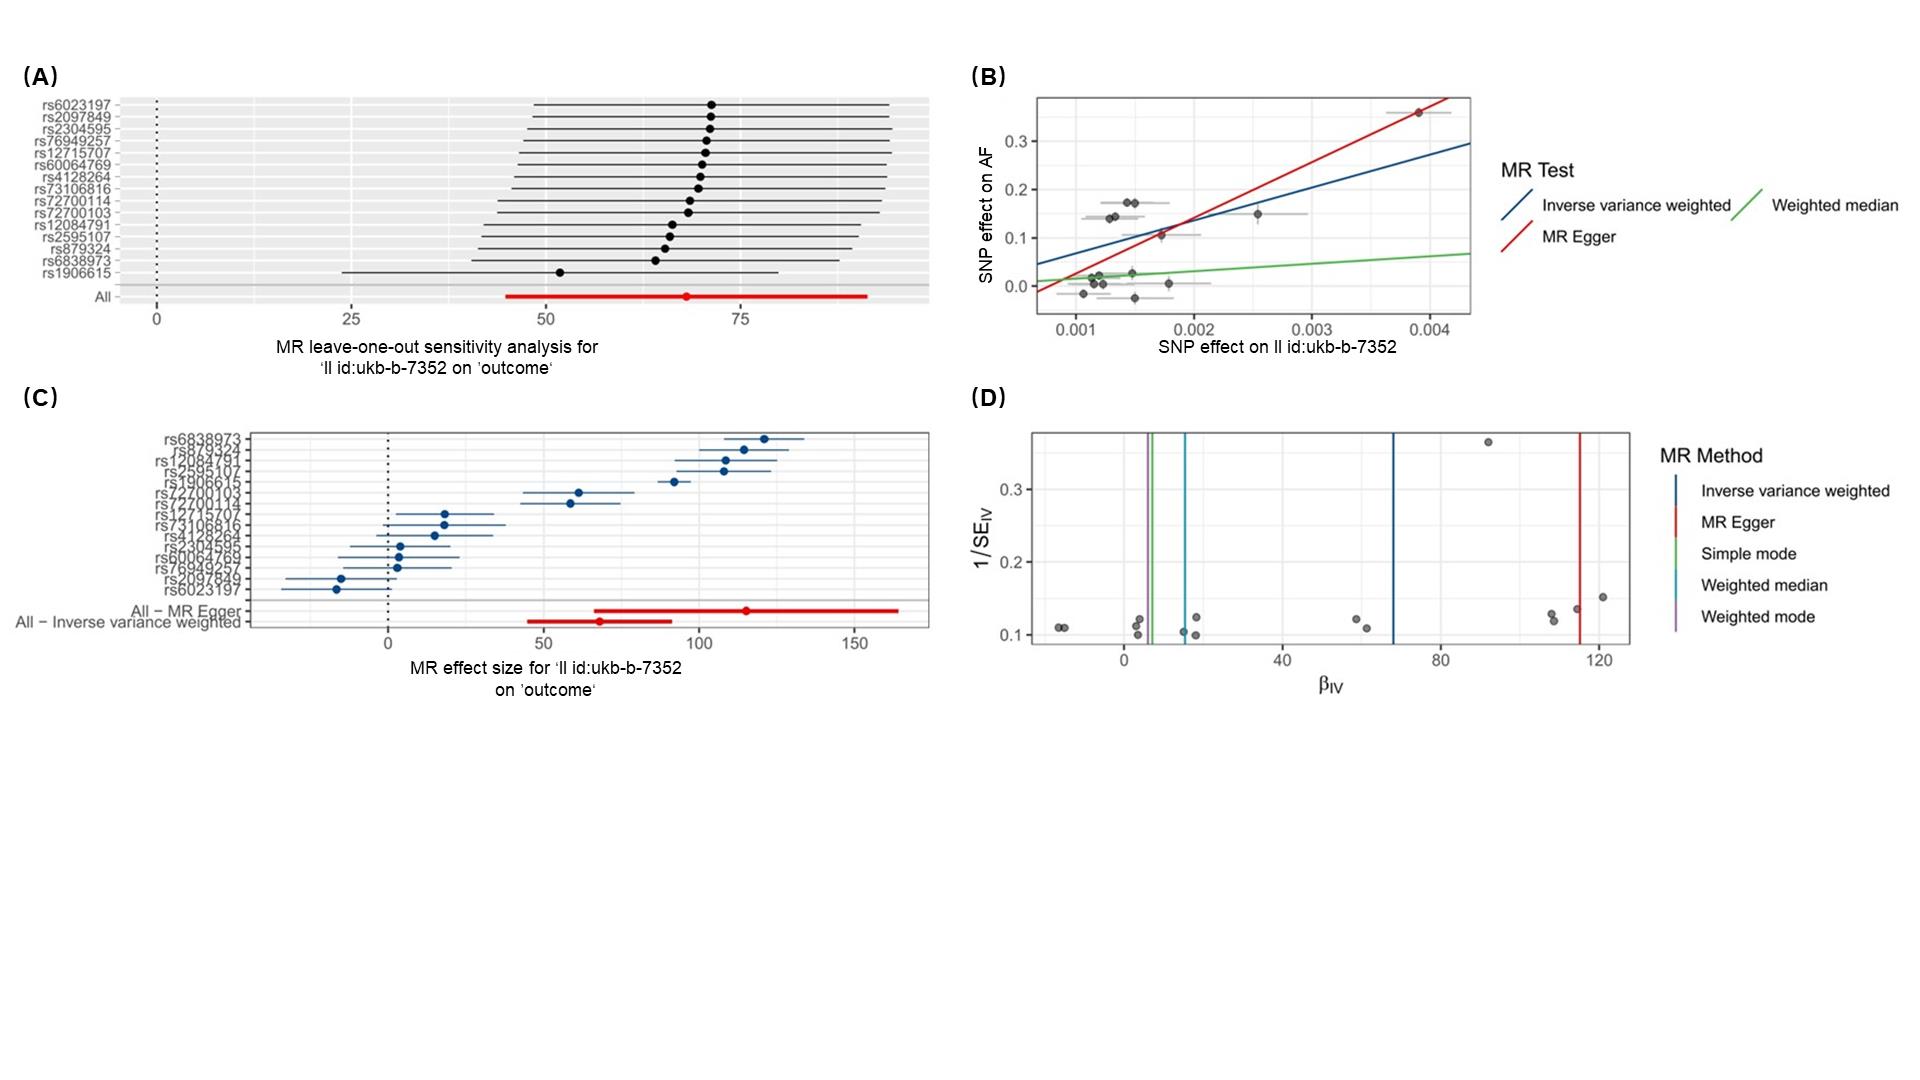


**(A)** MR leave-one-out sensitivity analysis. **(B)** MR scatter plot (Three detection methods, namely inverse variance weighted, weighted median, and mr-egger, were utilized). **(C)** MR_forest_plot. **(D)** MR_funnel_plot.

**The causal effect of AF on associated risk: ukb-b-7352**


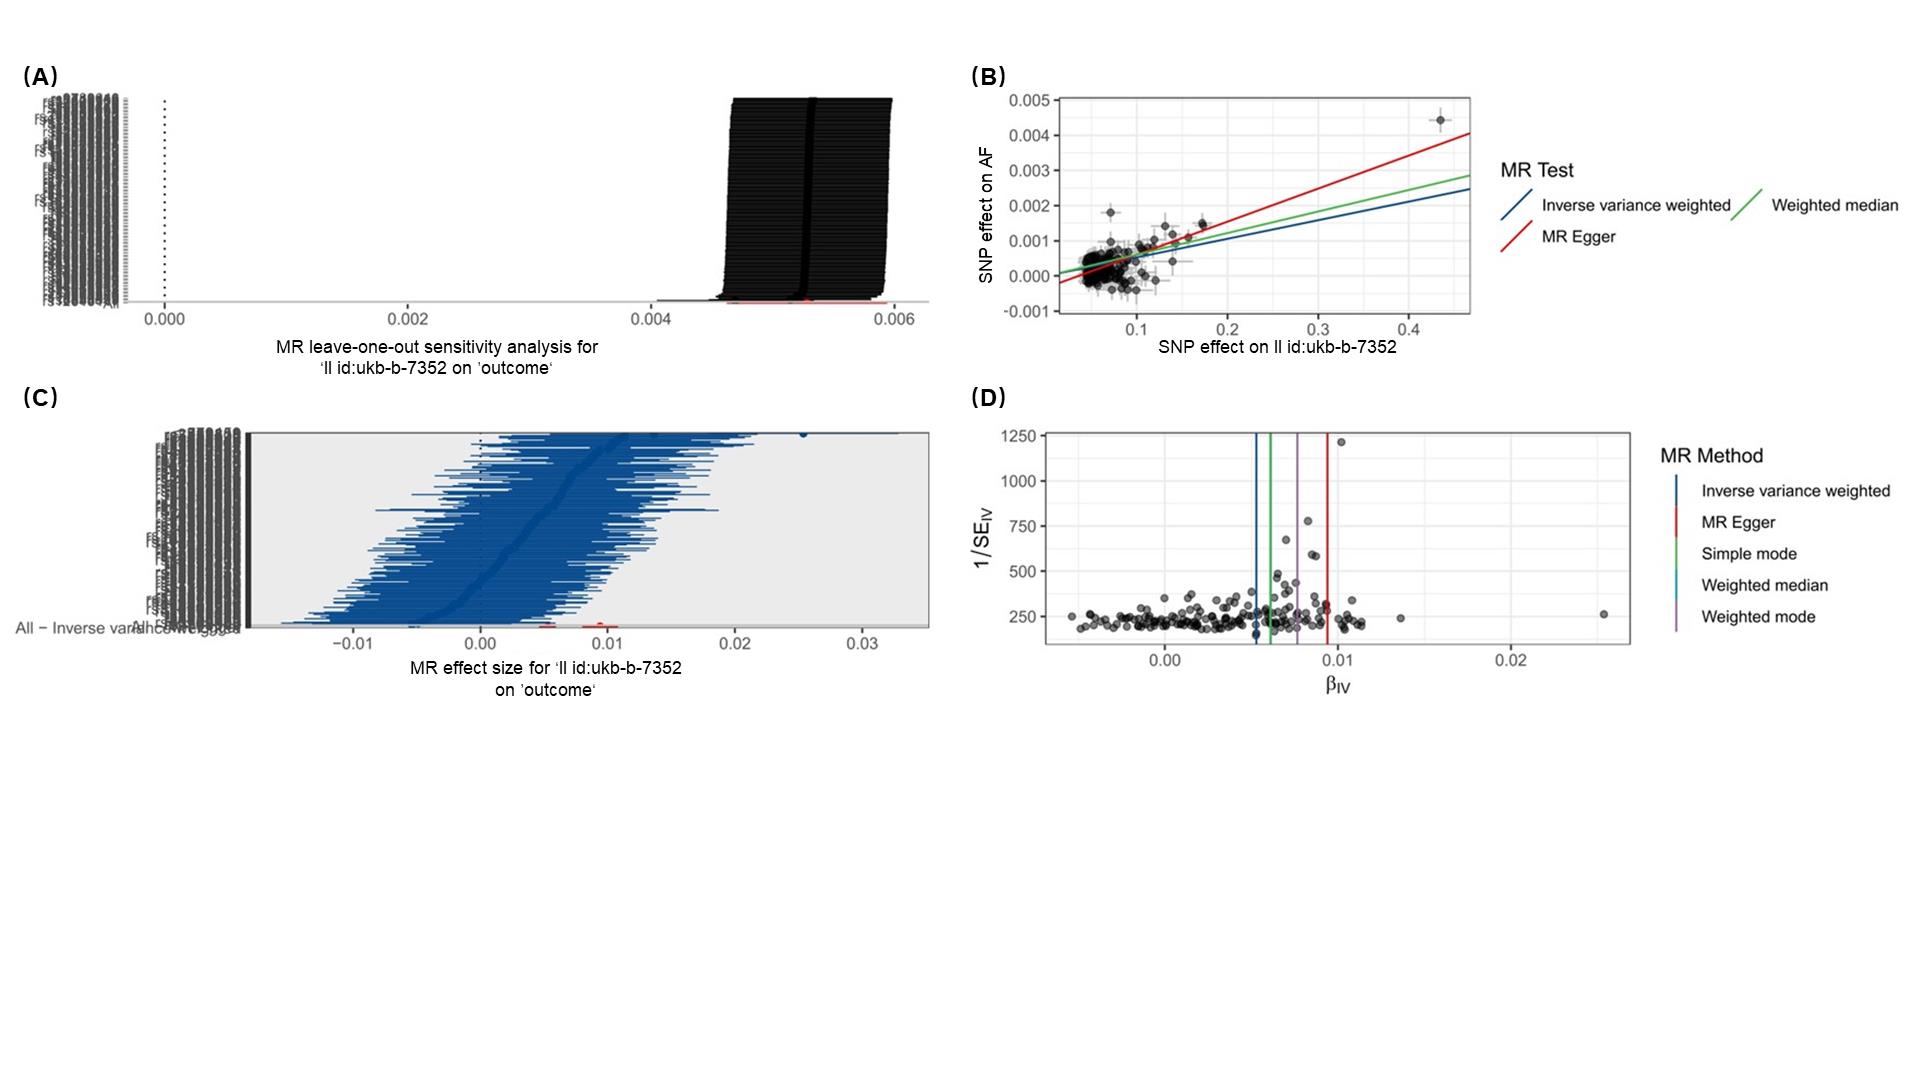


**(A)** MR leave-one-out sensitivity analysis. **(B)** MR scatter plot (Three detection methods, namely inverse variance weighted, weighted median, and mr-egger, were utilized). **(C)** MR_forest_plot. **(D)** MR_funnel_plot.

**The causal effect of associated risk on AF: ukb-b-10272**


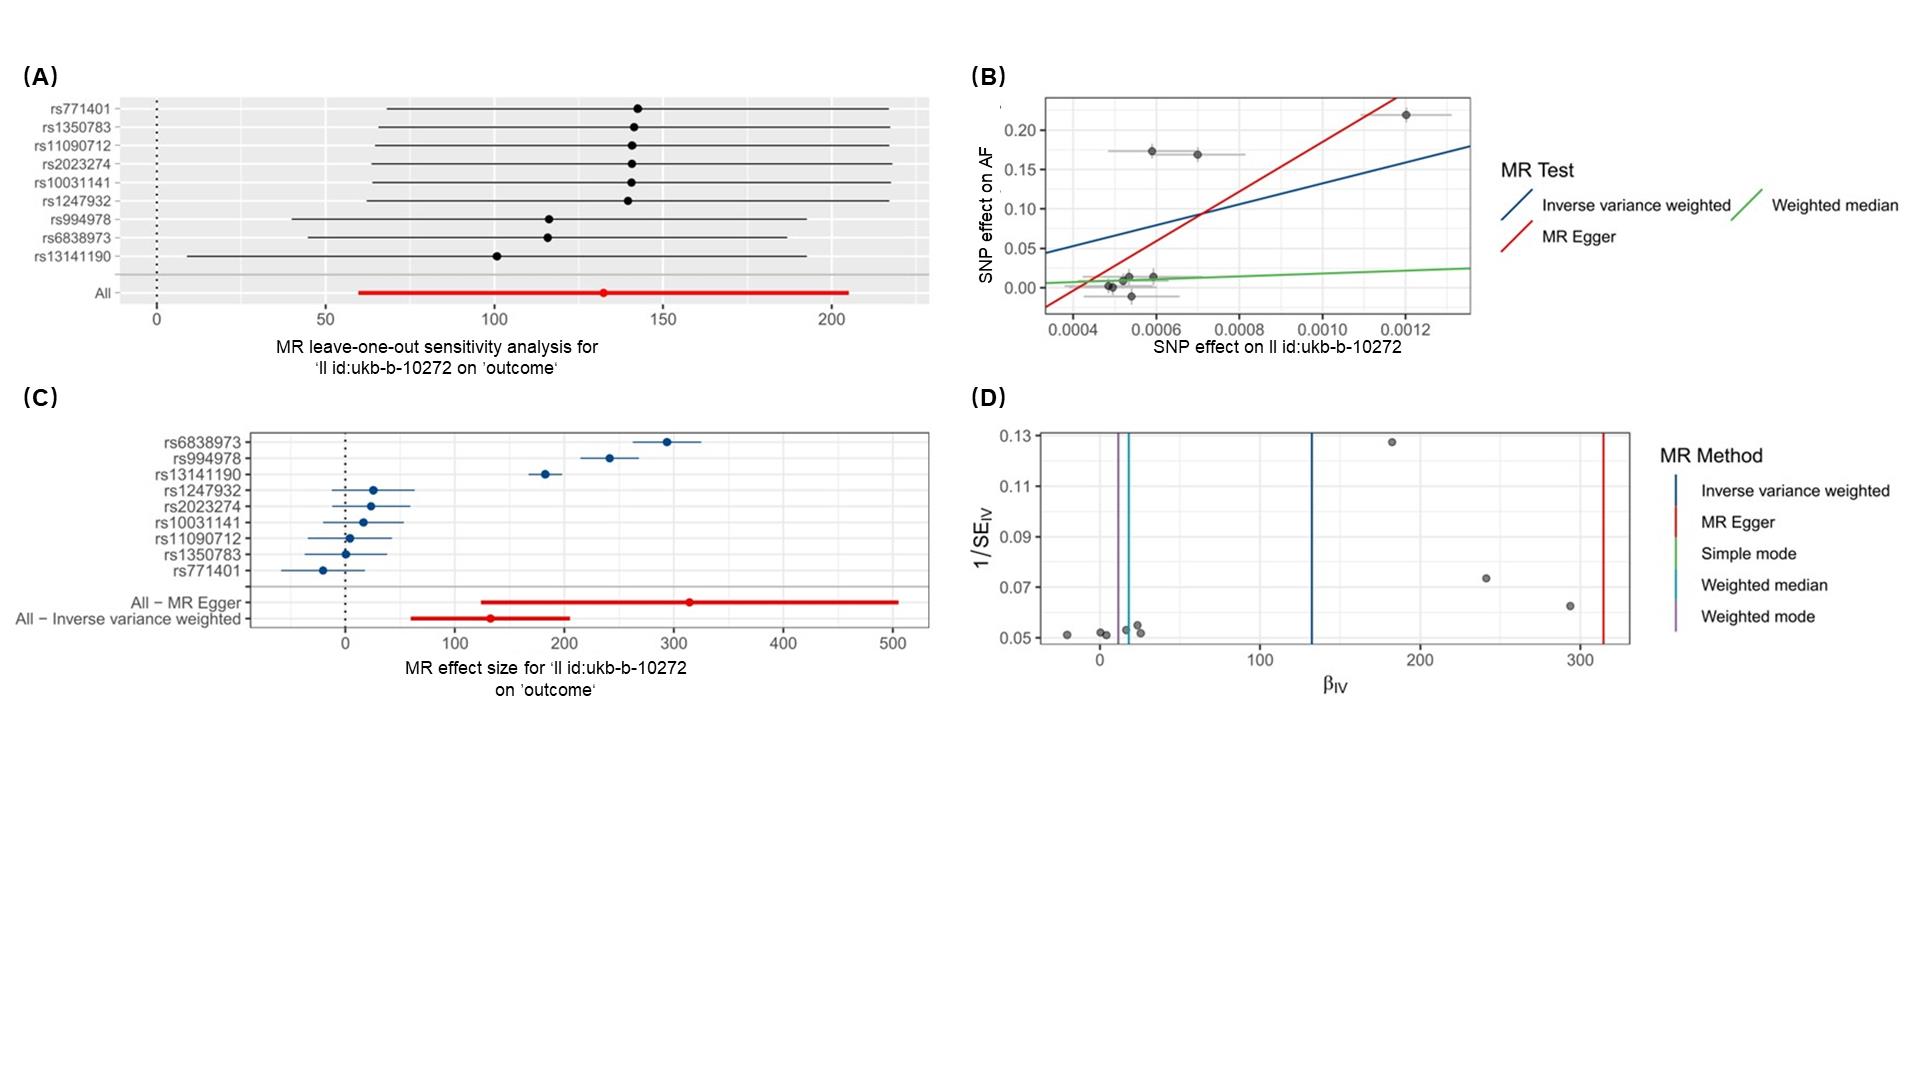


**(A)** MR leave-one-out sensitivity analysis. **(B)** MR scatter plot (Three detection methods, namely inverse variance weighted, weighted median, and mr-egger, were utilized). **(C)** MR_forest_plot. **(D)** MR_funnel_plot.

**The causal effect of AF on associated risk: ukb-b-10272**


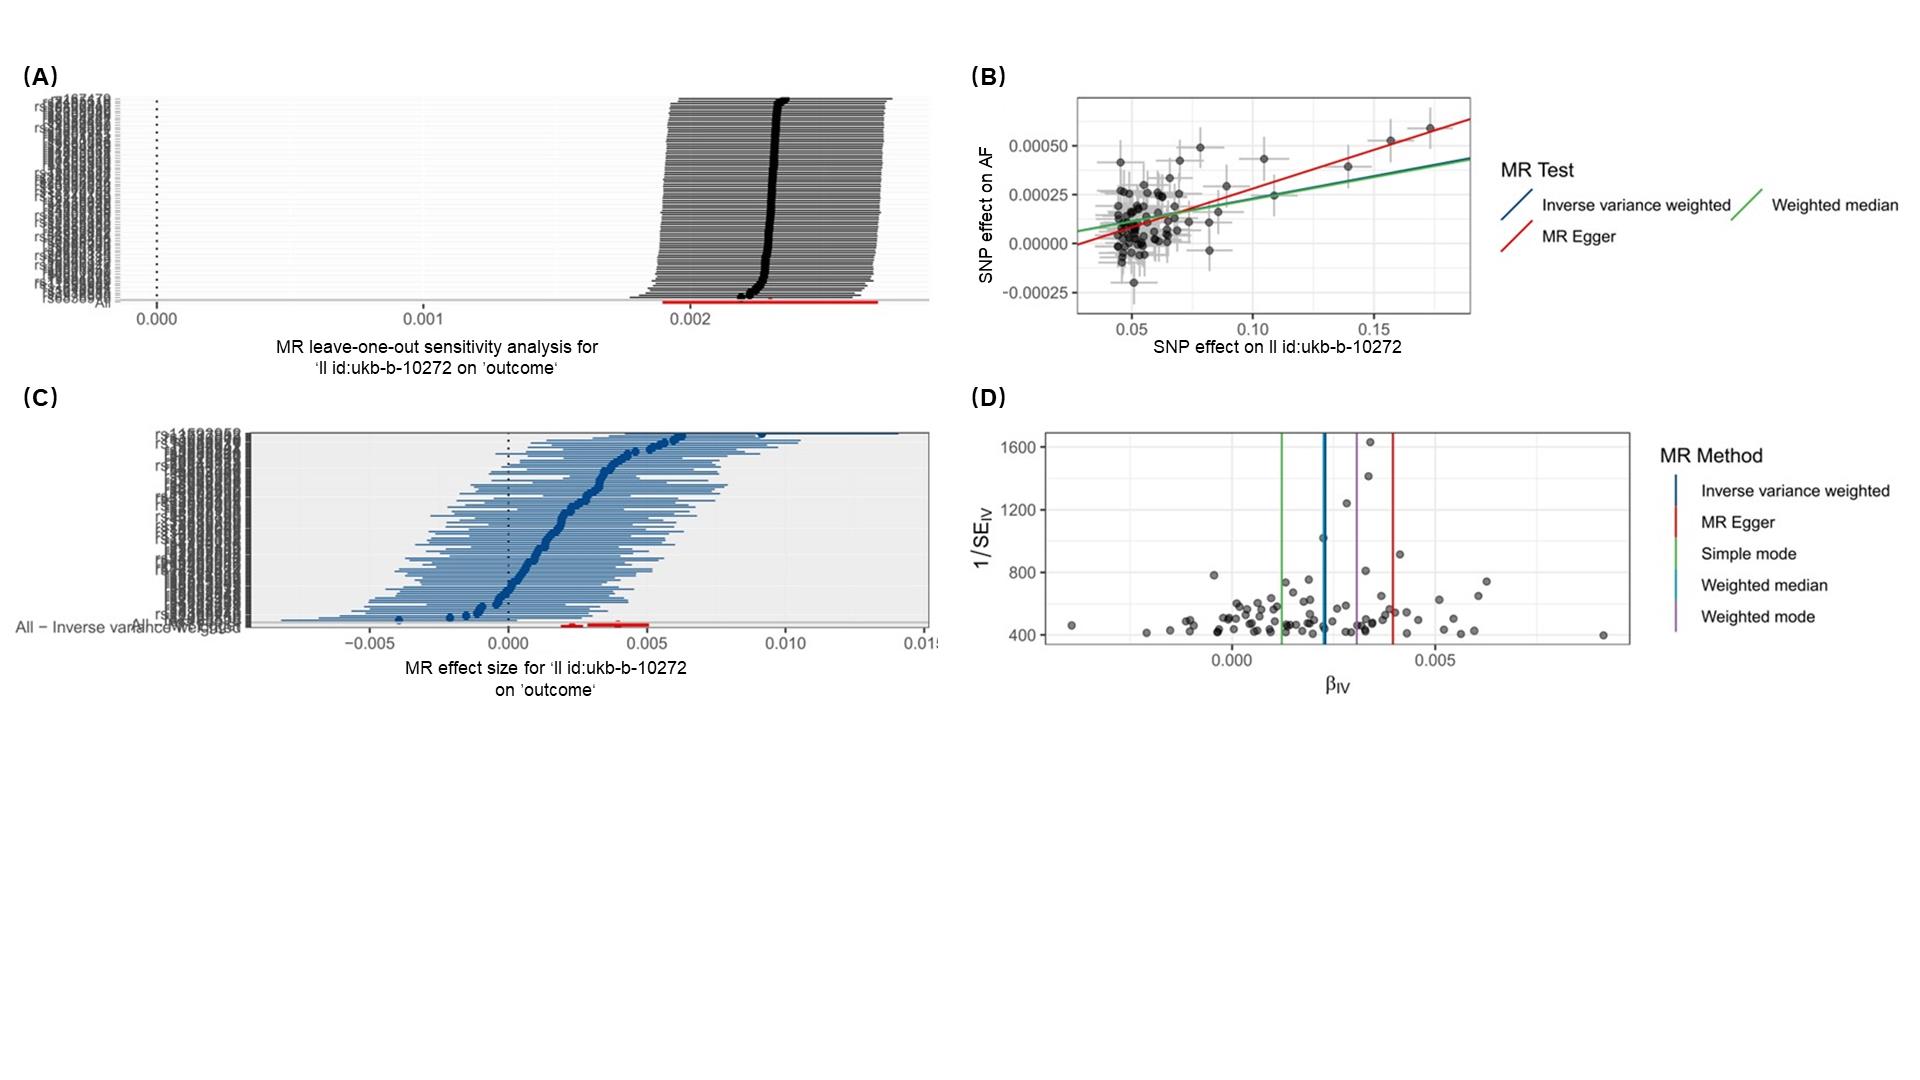


**(A)** MR leave-one-out sensitivity analysis. **(B)** MR scatter plot (Three detection methods, namely inverse variance weighted, weighted median, and mr-egger, were utilized). **(C)** MR_forest_plot. **(D)** MR_funnel_plot.

**The causal effect of associated risk on AF: ukb-b-10444**

**
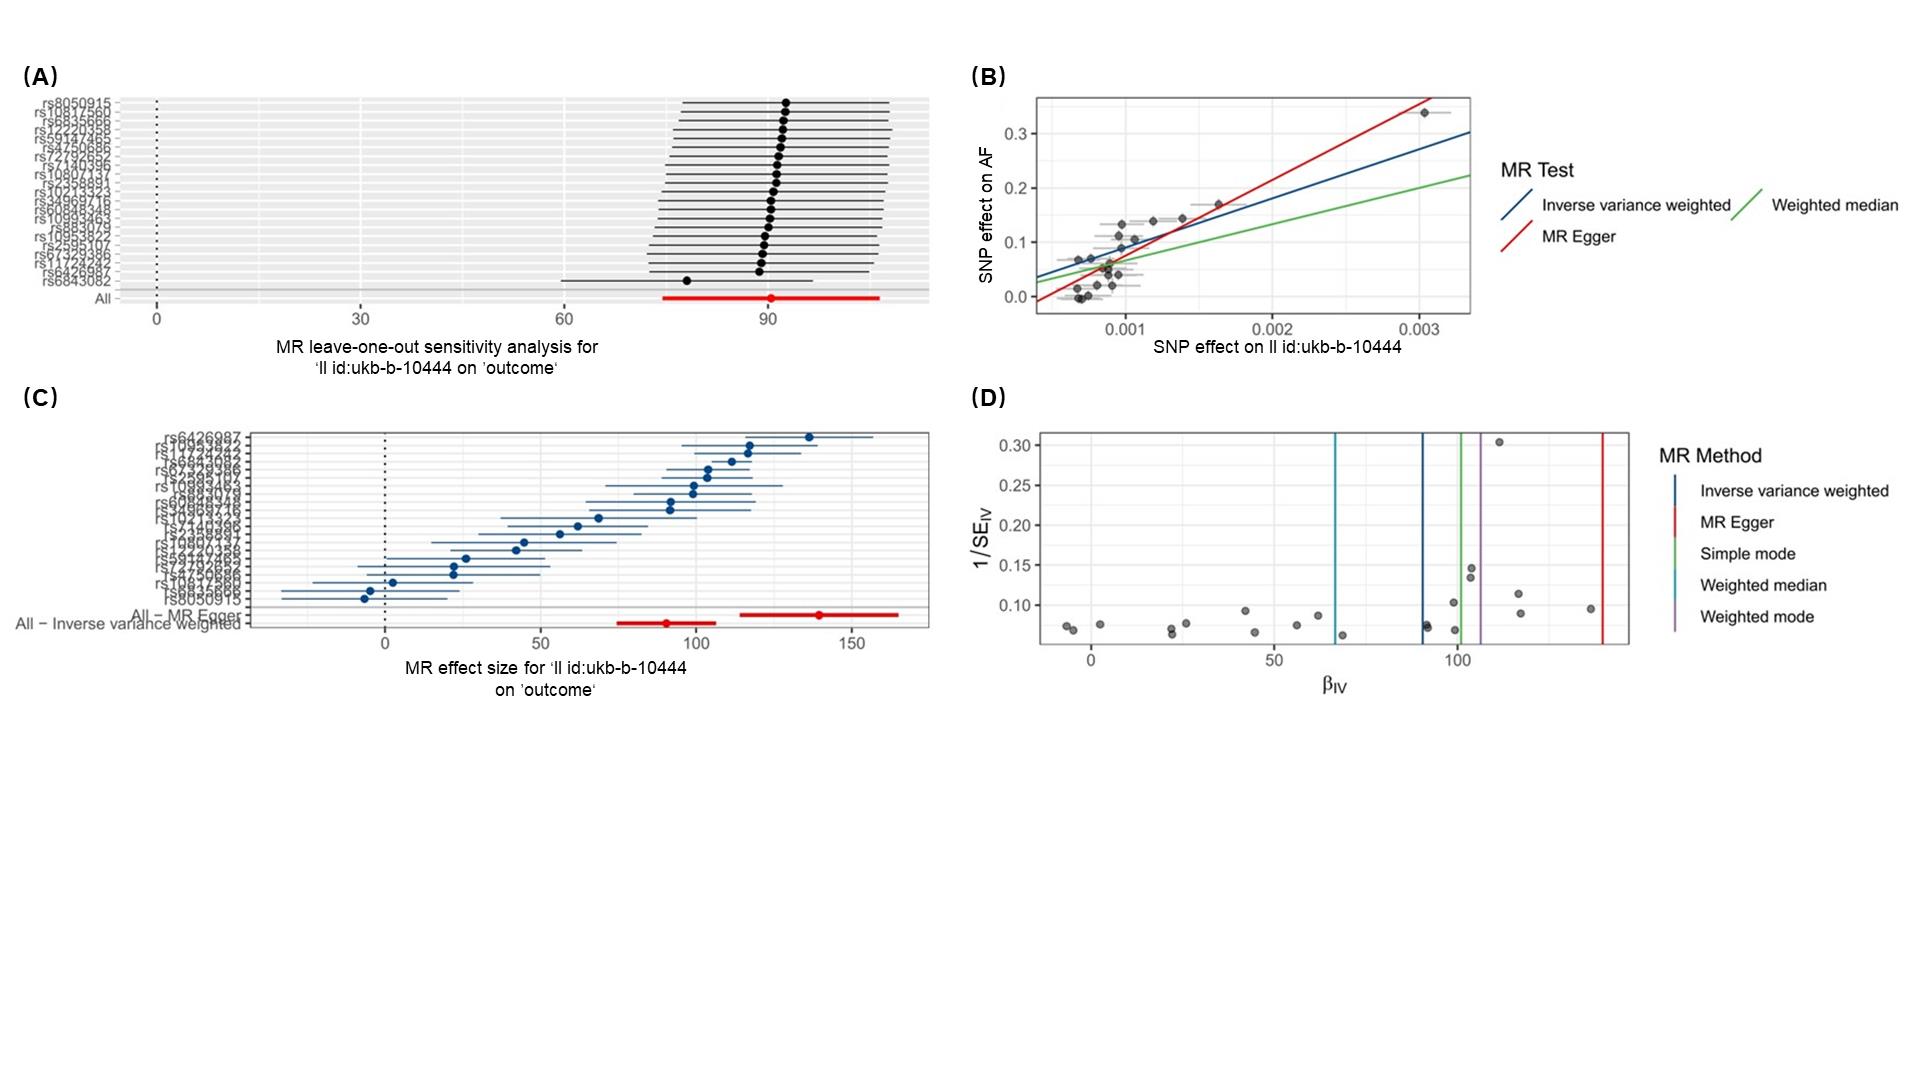
**

**(A)** MR leave-one-out sensitivity analysis. **(B)** MR scatter plot (Three detection methods, namely inverse variance weighted, weighted median, and mr-egger, were utilized). **(C)** MR_forest_plot. **(D)** MR_funnel_plot.

**The causal effect of AF on associated risk: ukb-b-10444**


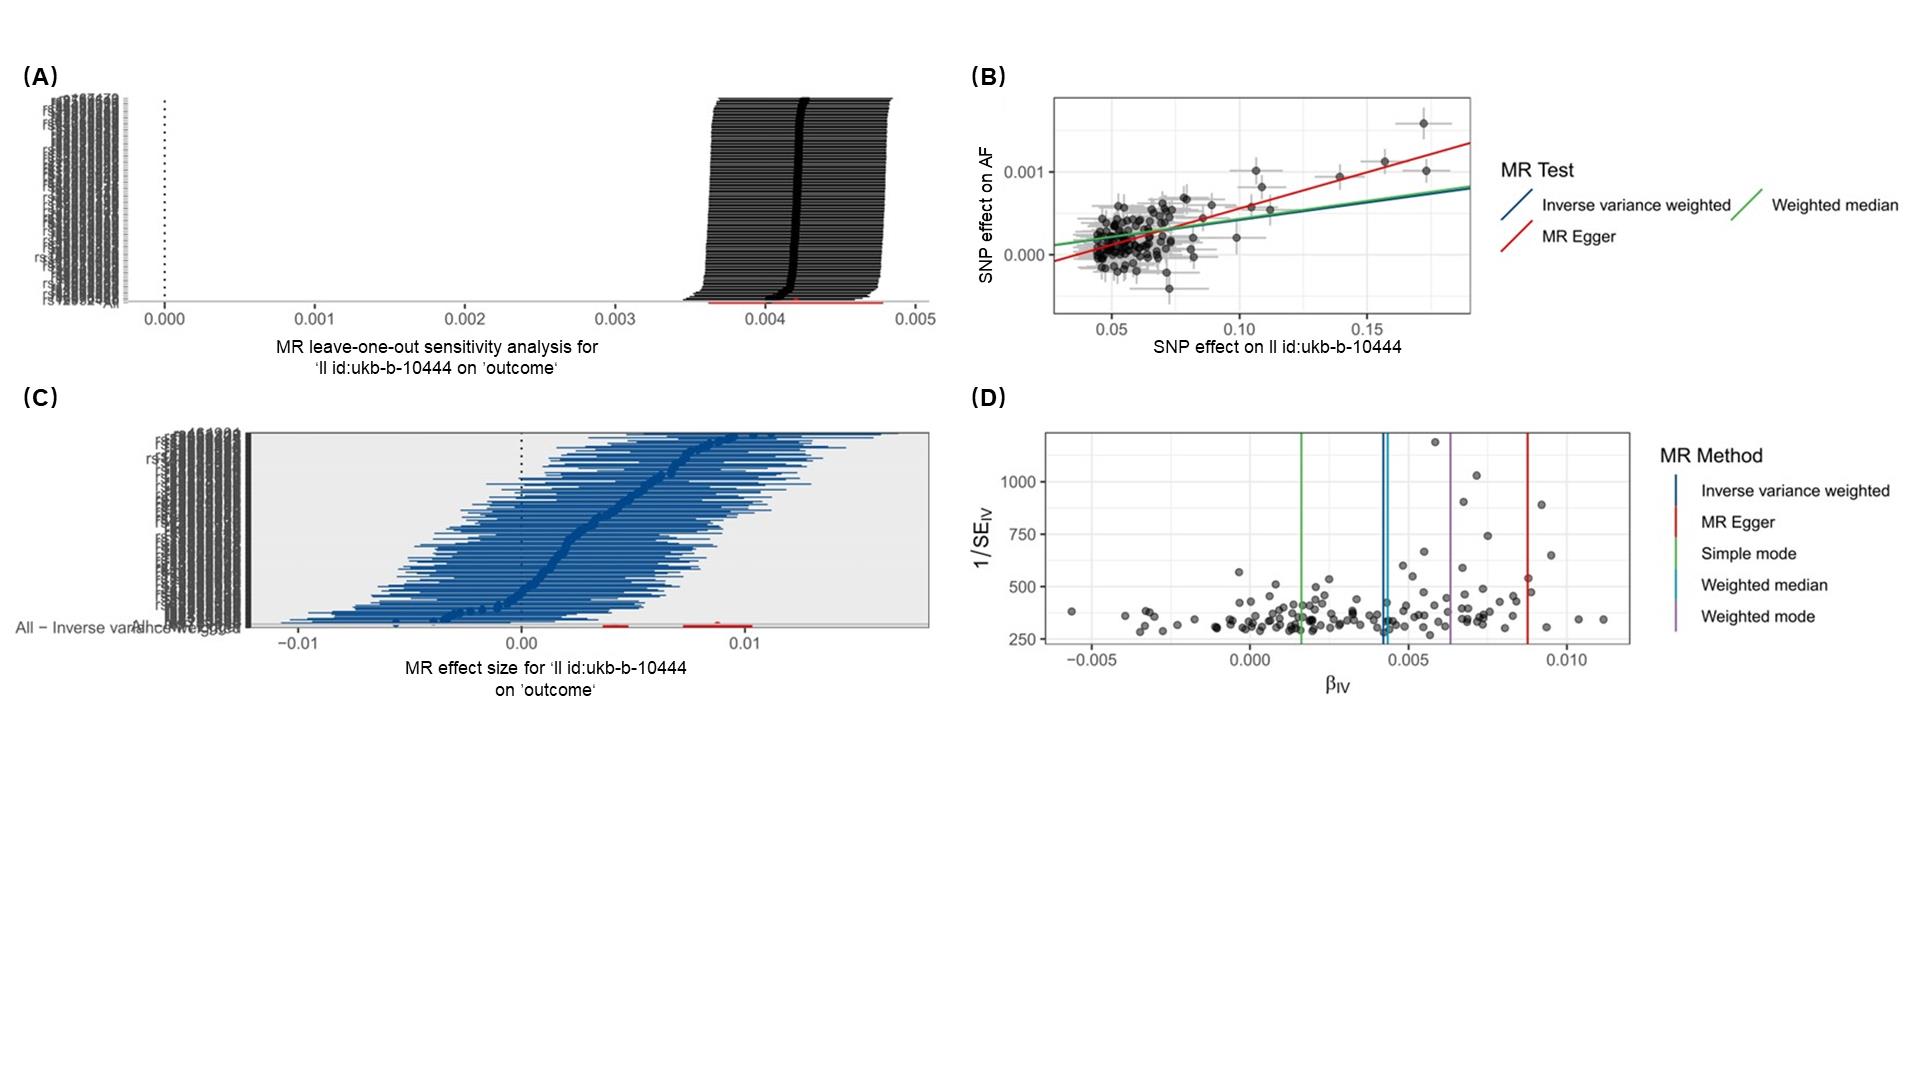


**(A)** MR leave-one-out sensitivity analysis. **(B)** MR scatter plot (Three detection methods, namely inverse variance weighted, weighted median, and mr-egger, were utilized). **(C)** MR_forest_plot. **(D)** MR_funnel_plot.

**The causal effect of associated risk on AF: ukb-b-13248**


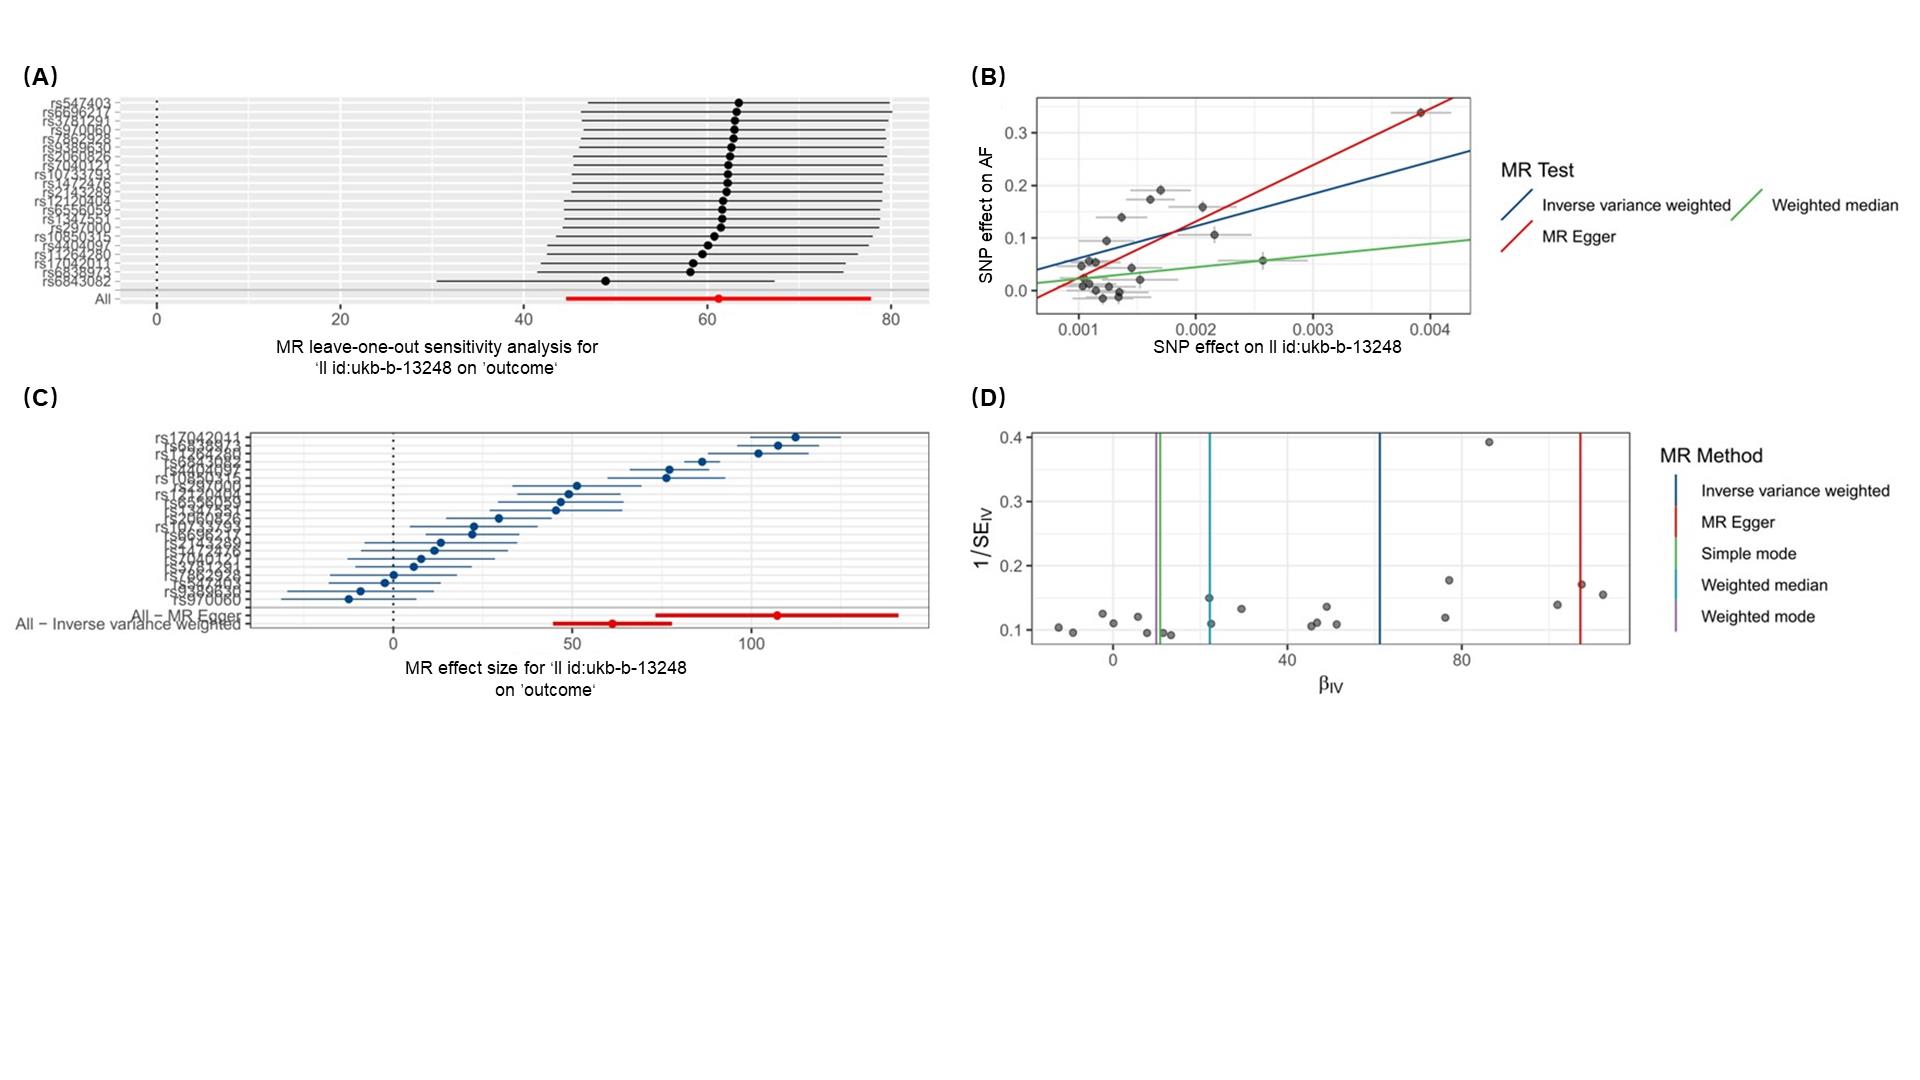


**(A)** MR leave-one-out sensitivity analysis. **(B)** MR scatter plot (Three detection methods, namely inverse variance weighted, weighted median, and mr-egger, were utilized). **(C)** MR_forest_plot. **(D)** MR_funnel_plot.

**The causal effect of AF on associated risk: ukb-b-13248**


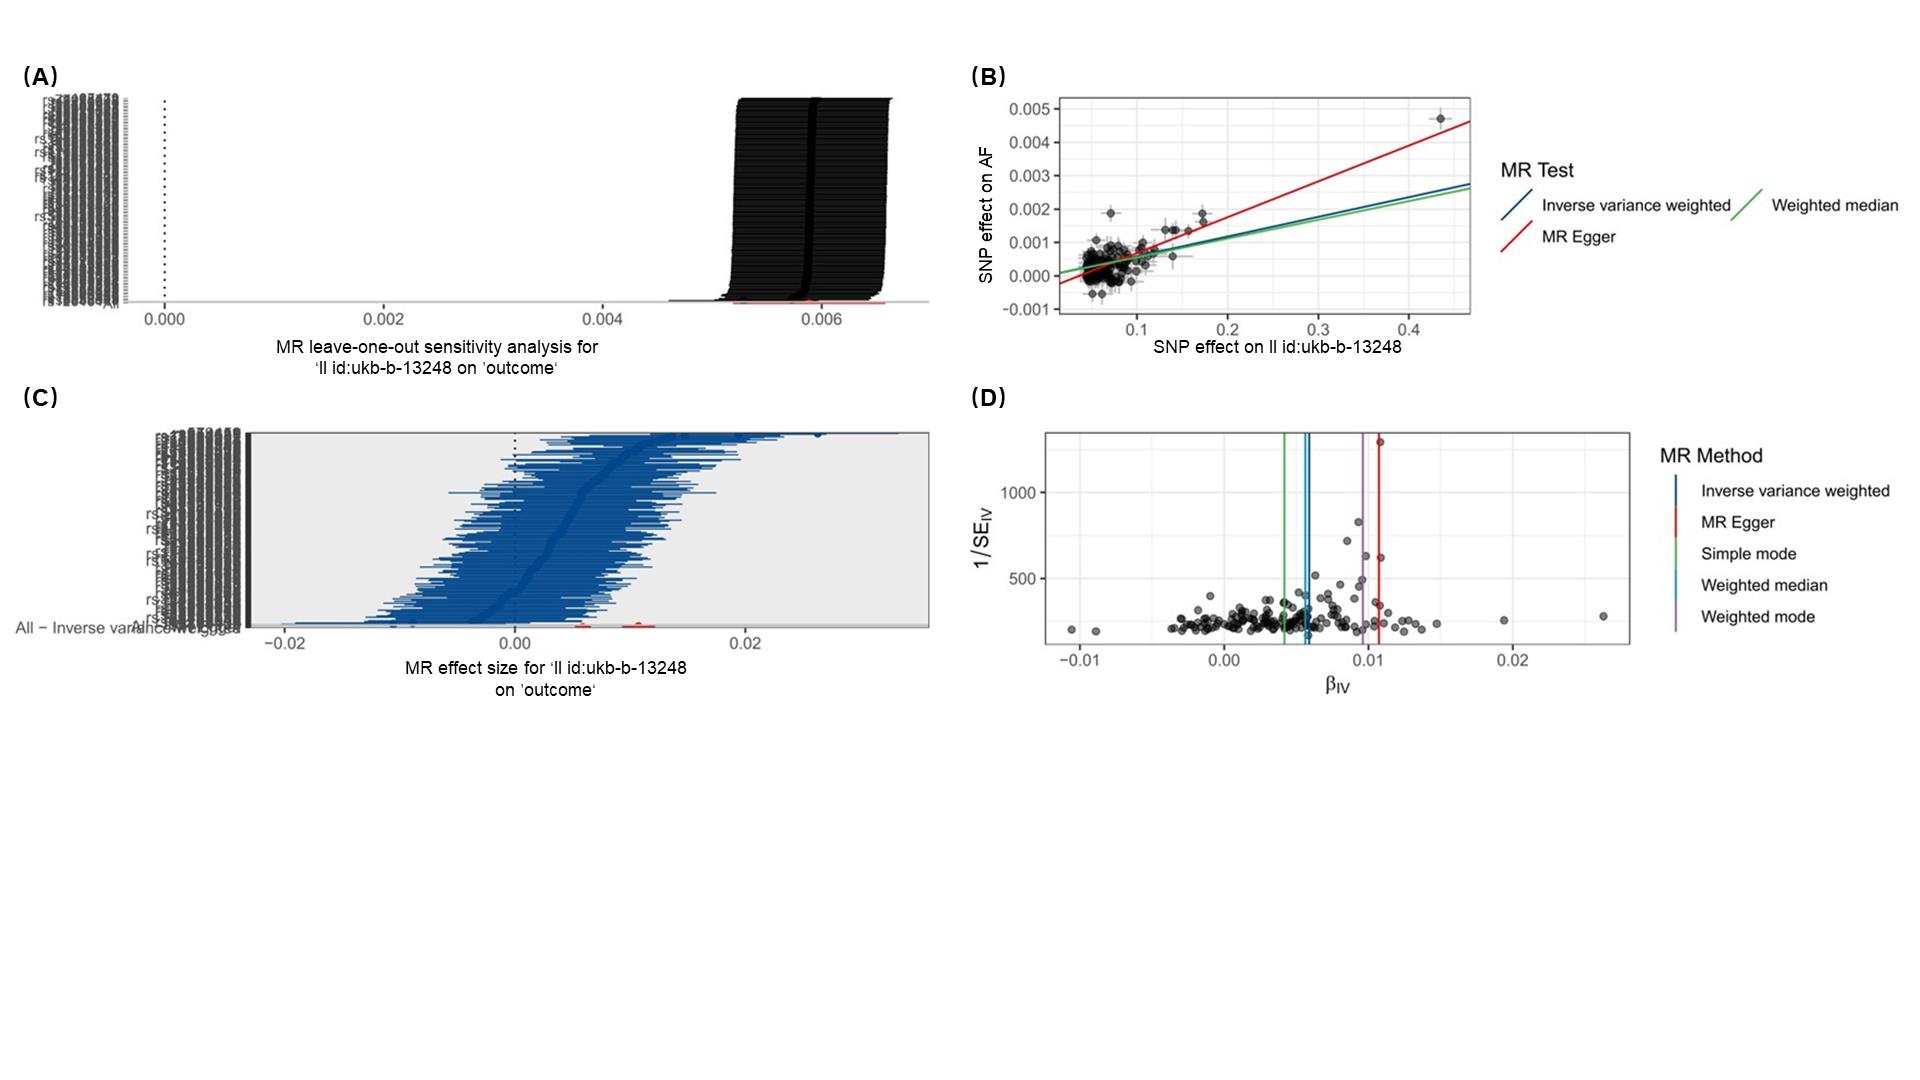


**(A)** MR leave-one-out sensitivity analysis. **(B)** MR scatter plot (Three detection methods, namely inverse variance weighted, weighted median, and mr-egger, were utilized). **(C)** MR_forest_plot. **(D)** MR_funnel_plot.

**The causal effect of associated risk on AF: ukb-b-18103**


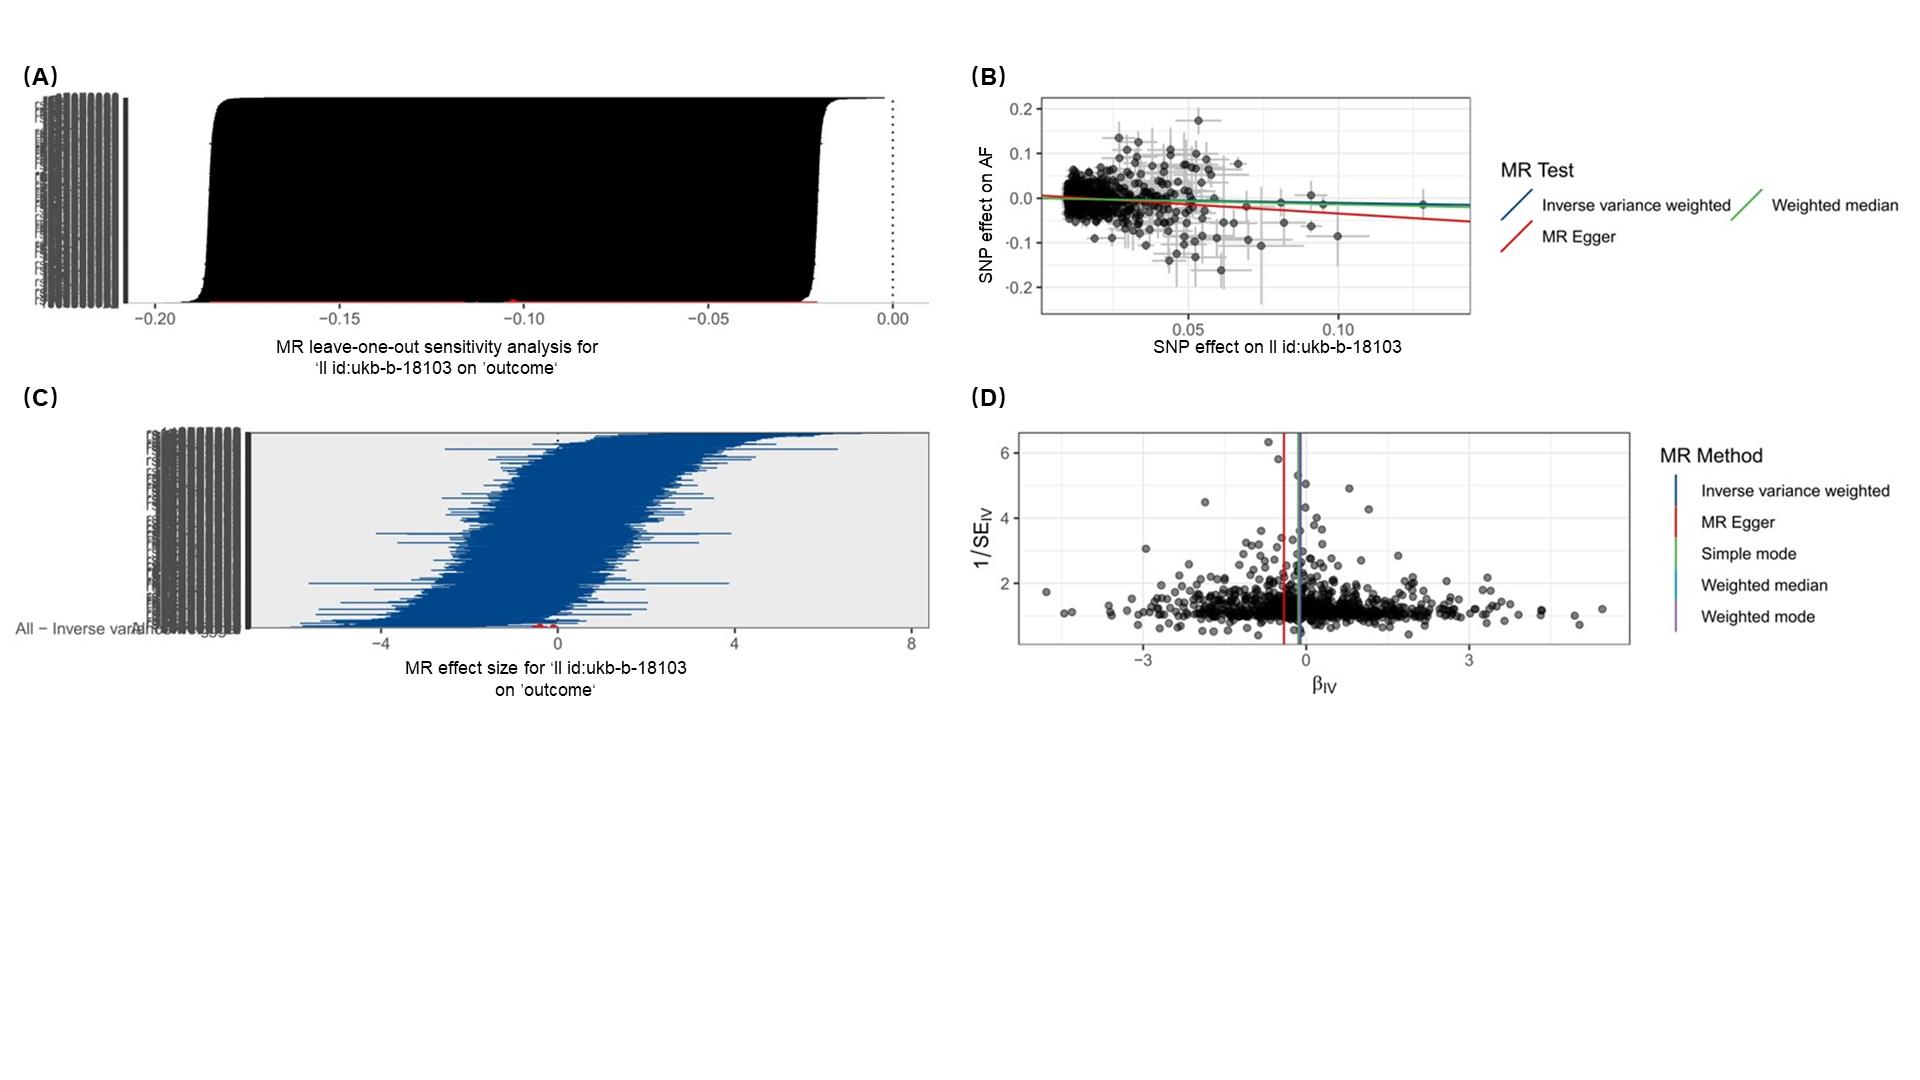


**(A)** MR leave-one-out sensitivity analysis. **(B)** MR scatter plot (Three detection methods, namely inverse variance weighted, weighted median, and mr-egger, were utilized). **(C)** MR_forest_plot. **(D)** MR_funnel_plot.

**The causal effect of AF on associated risk: ukb-b-18103**


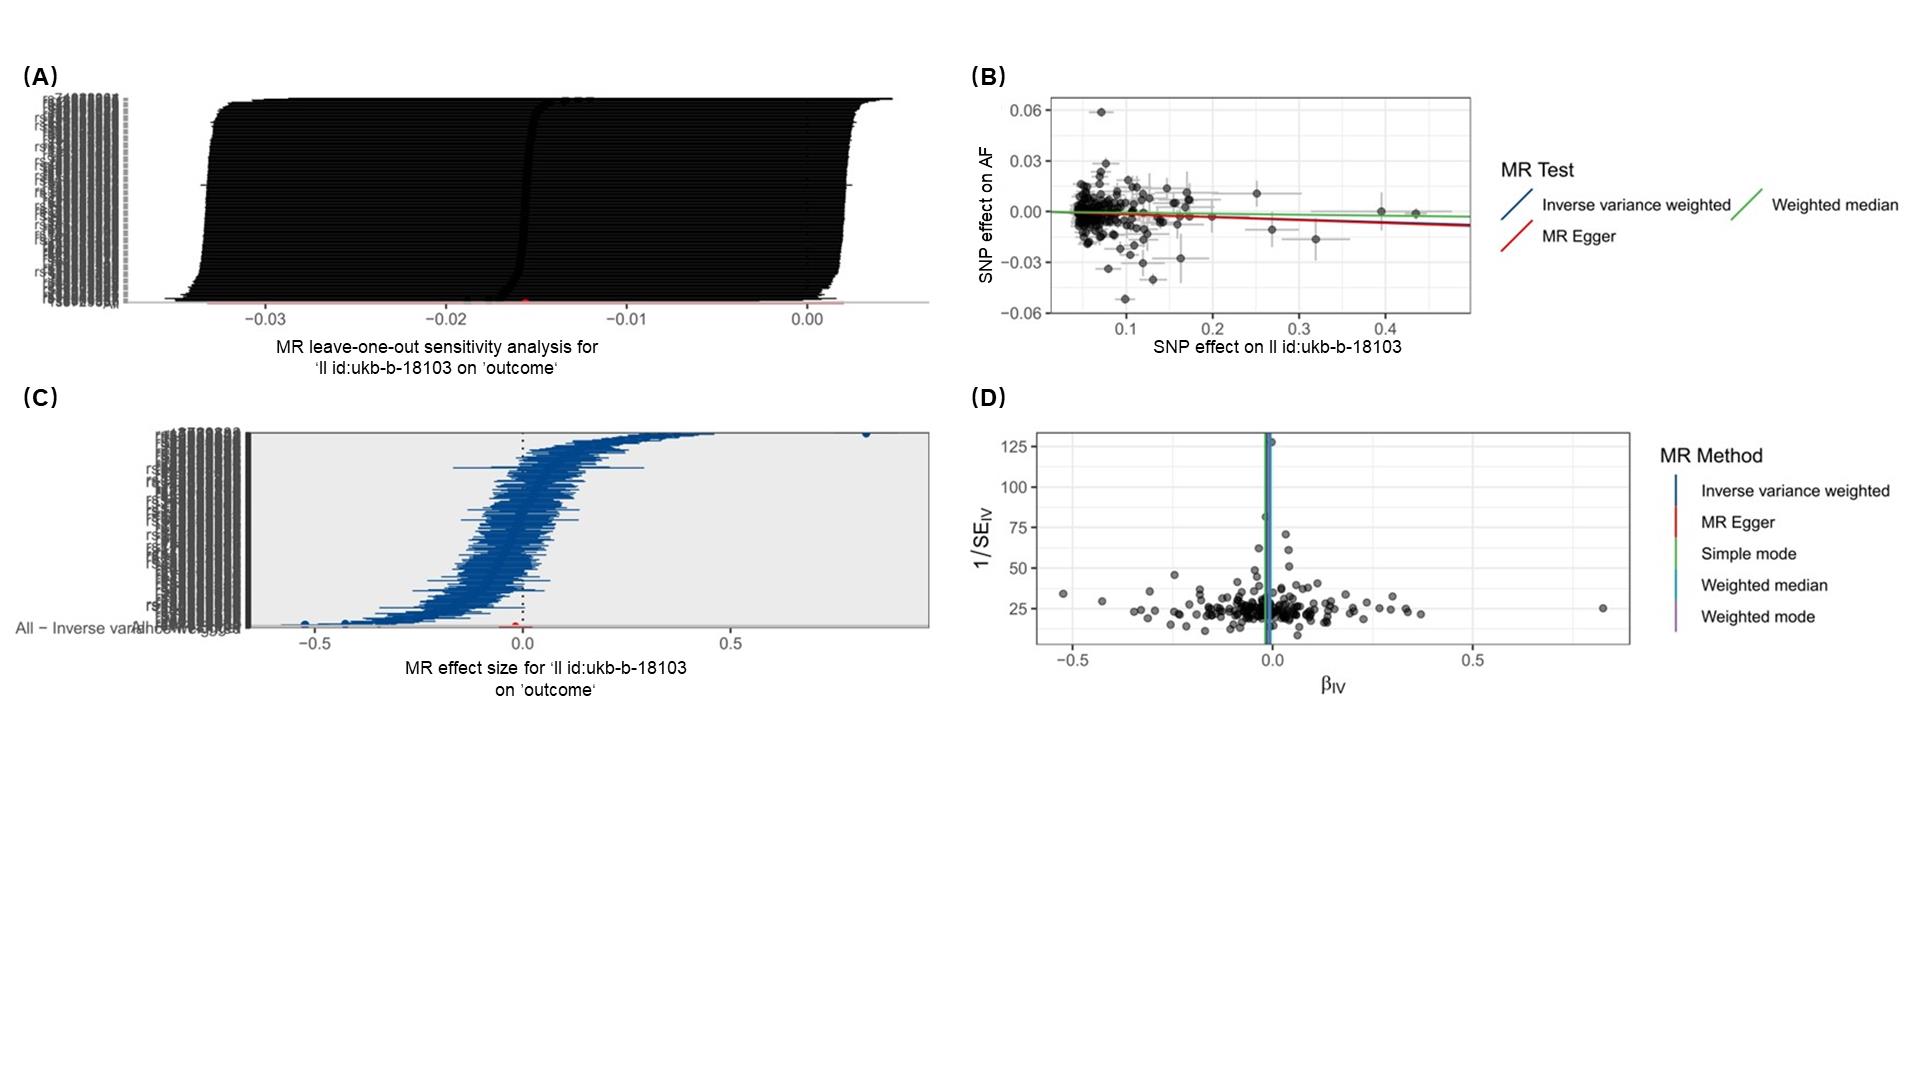


**(A)** MR leave-one-out sensitivity analysis. **(B)** MR scatter plot (Three detection methods, namely inverse variance weighted, weighted median, and mr-egger, were utilized). **(C)** MR_forest_plot. **(D)** MR_funnel_plot.
